# Supplementary material
Source: PubMed Central journal article supplement (PMC8986041)
Supplement: 7736_2_supp_91233_r00h79.pdf [file 7736_2_supp_91233_r00h79.pdf]

## SUPPLEMENTAL MATERIAL

### Supplemental Material Table of Contents

- I. Supplemental Methods and supporting figures
- II. Supplemental Table S1 describing the AlloMap Heart and AlloMap Kidney genes
- III. Supplemental Table S2 listing the AlloMap Kidney reference genes

#### I. Supplemental Methods

For AlloMap Kidney, an RNA-seq platform incorporating unique molecular tags was used to enable improved detection of low-expression genes, higher reproducibility, and accurate measurement of gene expression changes that can be readily expanded to additional gene sets and classifiers. The training data were generated on the AlloMap Heart qPCR platform. As both platforms measure the level of RNA in the same starting material, a conversion equation was defined based on the principles of the two methods. The conversion assumes that for the qPCR platform there is 98% PCR amplification efficiency and that a  $C_T$  of 39 is equivalent to one starting molecule (internal data at CareDx). For RNA-seq, the molecule counts were converted to  $C_T$ , then used in the AlloMap Kidney classifier as trained on qRT-PCR results. This conversion of the raw RNA-seq data before application to the classifier enabled the use of the locked classifier algorithm without any modification. To ensure reliable results, the conversion equations were tested using DART samples analyzed on both platforms that were not members of the sets used for training or testing the classifier but covered the critical range of the test results. The results generated from the original method (qRT-PCR) and the final test method (RNA-seq) on the same samples showed 92% correlation, demonstrating the validity of the conversion (**Supplemental Figure S1**).

The single-center sample set from Albert Einstein Medical Center was processed by extracting the RNA from the PAXgene tubes using manual spin columns. Due to the authors' experience with varying RNA transcript levels across extraction methods, the manual methods and the automated methods

were first compared on an independent sample set. Forty samples with paired PAXgene tubes (same venipuncture) from DART and two other studies in the biobanks at CareDx were extracted by the two methods and a conversion equation defined for the small overall difference (**Supplemental Figure S2**). After this conversion was determined and locked, the single-center validation set samples were subsequently run and the conversion was then applied as part of the data analysis to generate AlloMap Kidney results.

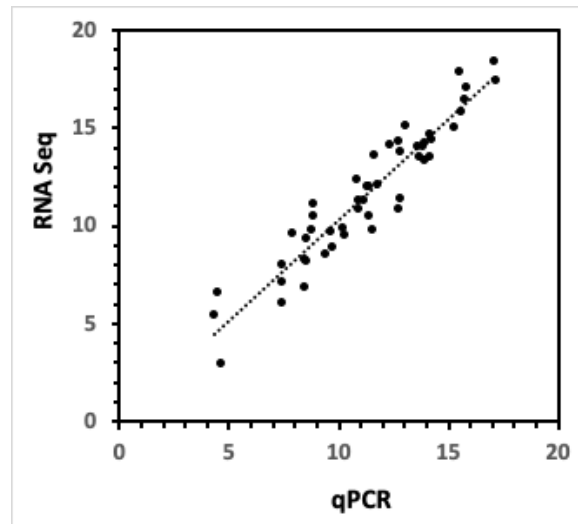

**Figure S1:** Conversion of AlloMap Kidney classifier trained on qPCR data to produce the same results from RNA-seq data.

(a)

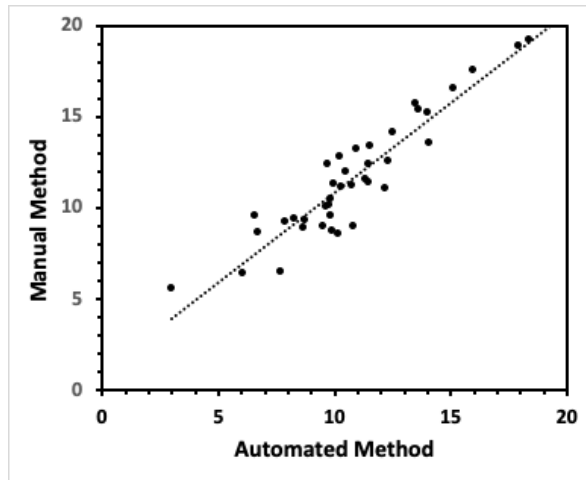

(b)

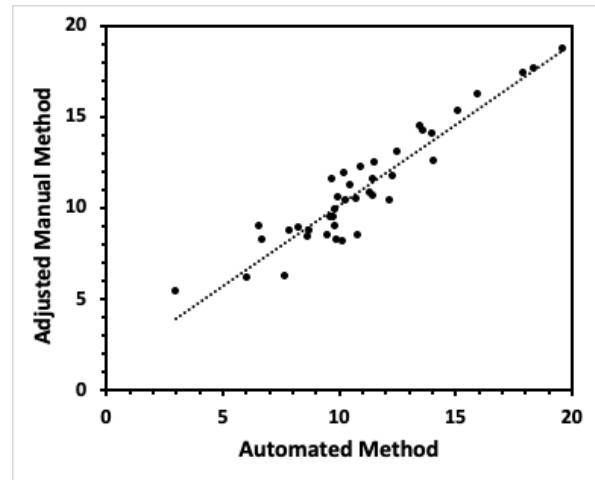

**Figure S2:** Comparison of AlloMap Kidney data from manual and automated extraction methods on the same 40 samples. **(a)** before adjustment, mean difference 0.7951, intercept = 0.422, slope = 0.897. **(b)** after adjustment, mean difference -0.0015, intercept -0.001, slope = 1.000.

## II. Supplemental Table S1

**Table S1.** Overview of the AlloMap genes. Utility is from Dedrick et al., 2007. Gene names and function from GeneCards (<https://www.genecards.org/>). Significance in training is the p-value of t-test for individual genes in the training sample set.

| Gene           |               | Associated Pathway                            | Gene Name                                 | Alternative Symbol(s) | Function                                                                                                 | Significance in Training |
|----------------|---------------|-----------------------------------------------|-------------------------------------------|-----------------------|----------------------------------------------------------------------------------------------------------|--------------------------|
| AlloMap Kidney | AlloMap Heart |                                               |                                           |                       |                                                                                                          |                          |
| PDCD1          | PDCD1         | T-cell priming                                | Programmed cell death 1                   | PD-1, SLEB2           | Immune inhibitory receptor. Regulates T cell functions.                                                  | 0.002                    |
| MARCH8         | MARCH8        | Proliferation and mobilization of blood cells | Membrane Associated Ring-CH-Type Finger 8 | MARCHF8, MIR          | Ubiquitin ligase, induces internalization of membrane glycoproteins                                      | 0.005                    |
| DCAF12         | WDR40A        | Proliferation and mobilization of blood cells | DDB1 and CUL4 Associated Factor 12        | WDR40A, KIAA1892      | Regulates activity of culling RING E3 ligases                                                            | <0.001                   |
| IL1R2          | IL1R2         | Steroid Responsive                            | Interleukin 1 receptor type 2             | IL1RB, CD121b         | IL-1a, IL1B and IL1R1 decoy receptor inhibits signaling                                                  | 0.019                    |
| FLT3           | FLT3          | Steroid Responsive                            | FMS Related Receptor Tyrosine Kinase 3    | FLT3                  | Regulates hematopoiesis by activating pathways involved in apoptosis, proliferation, and differentiation | 0.017                    |
|                | ITGA4         | T-cell priming                                | Integrin alpha-4                          | ITGA4                 | T cell motility and adhesion                                                                             | 0.176                    |
|                | ITGAM         | T-cell priming                                | Integrin alpha-M                          | MAC-1, CD11b, CR3A    | Alpha subunit of MAC-1 involved in cell trafficking                                                      | 0.662                    |
|                | PF4           | Platelet Activation                           | Platelet factor 4                         | CXCL4                 | Platelet aggregation, chemotactic for numerous cell types                                                | 0.017                    |
|                | C6orf25       | Platelet Activation                           | G6b inhibitory receptor                   | G6b, MPIG6B           | MHC class III Inhibitory receptor of the Ig superfamily                                                  | 0.420                    |
|                | SEM7A         | Lymphocyte activation                         | Semaphorin 7A                             | SEMAL                 | Marker of activated lymphocytes.                                                                         | 0.169                    |
|                | RHOU          | Leukocytes migrating into tissues             | Ras homolog gene family member U          | ARHU                  | Rho GPT-ase amiliy involved in cytoskeleton ogranization                                                 | 0.435                    |

### III. Supplemental Table S2

**Table S2.** List of the AlloMap reference genes. In both cases, reference genes were chosen as invariant in a set of NR or Q samples. Gene names from GeneCards (<https://www.genecards.org/>).

| Gene                    |                           | Gene Name                                              |
|-------------------------|---------------------------|--------------------------------------------------------|
| AlloMap Kidney Training | AlloMap Kidney Validation |                                                        |
| ERCC5                   |                           | ERCC Excision Repair 5, Endonuclease cell death 1      |
| GABPB2                  | GABPB2                    | GA Binding Protein Transcription Factor Subunit Beta 2 |
| CCDC159                 |                           | Coiled-Coil Domain Containing Protein 159              |
| GPI                     |                           | Glucose-6-Phosphate Isomerase                          |
| RPLP1                   |                           | Ribosomal Protein Lateral Stalk Subunit P1             |
| GUSB                    | GUSB                      | Glucuronidase Beta                                     |
|                         | DEC1                      | 2,4-Dienoyl-CoA Reductase 1                            |
|                         | EWSR1                     | EWS RNA Binding Protein 1                              |
|                         | GAPDH                     | Glyceraldehyde-3-Phosphate Dehydrogenase               |
|                         | HSP90AB1                  | Heat Shock Protein 90 Alpha Family Class B Member 1    |
|                         | MAP3K3                    | Mitogen-Activated Protein Kinase Kinase Kinase 3       |
|                         | MAPK9                     | Mitogen-Activated Protein Kinase 9                     |
|                         | NONO                      | Non-POU Domain Containing Octamer Binding              |
|                         | RXRβ                      | Retinoid X Receptor Beta                               |
|                         | SDHA                      | Succinate Dehydrogenase Complex Flavoprotein Subunit A |
|                         | SRRM1                     | Serine And Arginine Repetitive Matrix 1                |
|                         | TBC1D10B                  | TBC1 Domain Family Member 10B                          |
|                         | TBP                       | TATA-Box Binding Protein                               |
|                         | TOP2B                     | DNA Topoisomerase II Beta                              |
